# Supplementary material
Source: PubMed Central journal article supplement (PMC7111918)

**Figure S1.** Prevalence of amino acids in agnoproteins from polyomaviruses. The number of each residue is represented by a blue bar, except for methionine which is shown in a black bar. The red line represents the theoretical expected frequency of a residue. E.g. BKPyV agnoprotein is 66 amino acids long. Therefore each amino acid is expected on average to occur  $66:20=3.3$  times.

**Figure S2.** Kyte-Doolittle hydropathy plot of agnoproteins from polyomaviruses. The algorithm program <http://gcat.davidson.edu/DGPB/kd/kyte-doolittle.htm> was used.

Table S1. Mutations in agnoprotein of PyV isolates. The one-letter amino acid code was used. Reported mutations are based on sequences deposited in the GenBank. Del= deletion.

| <b>BKPyV</b> | <b>JCPyV</b>           | <b>SV40</b> |
|--------------|------------------------|-------------|
| R8L, R8Q     | L3F, L3del             | S21T        |
| Q9H          | Q5L                    | Q26L, Q26R  |
| QASV9-12del  | S7L                    | L28F, L28I  |
| K13R         | A10V                   | K49del      |
| V14I, V14L   | S11F                   | K51G, K51R  |
| G15S         | V12M                   | E54Q        |
| K23R         | K13T                   | K59N        |
| F29L         | V14G, V14L             |             |
| E38K         | K23R                   |             |
| F39L         | L29F, L29I             |             |
| E43K         | F31I                   |             |
| EDS43-45del  | L32W                   |             |
| V46I, V46L   | L33V                   |             |
| D47H         | D38E, D38G, D38N       |             |
| N50I         | C40F                   |             |
| S52G         | CTGEDS40-45del         |             |
| ALP55-57del  | T41E, T41I             |             |
| K60R         | GE42-43del             |             |
| V63I         | GEDSVD42-47del         |             |
|              | E43G, E43K, E43Q       |             |
|              | EDSV43-46del           |             |
|              | EDSVD43-47del          |             |
|              | D44A, D44G             |             |
|              | S45R                   |             |
|              | V46E                   |             |
|              | D47G, D47H, D47N, D47V |             |
|              | Q52K                   |             |
|              | R53K                   |             |
|              | H54N, H54P             |             |
|              | S55C, S55I, S55R, S55T |             |
|              | G56A, G56R             |             |
|              | LTEQTYSS57-63del       |             |
|              | E59Q                   |             |
|              | T61K, T61R             |             |
|              | S63R                   |             |
|              | L65S                   |             |
|              | P68S                   |             |
|              | A70T                   |             |
|              | T71S                   |             |
|              |                        |             |

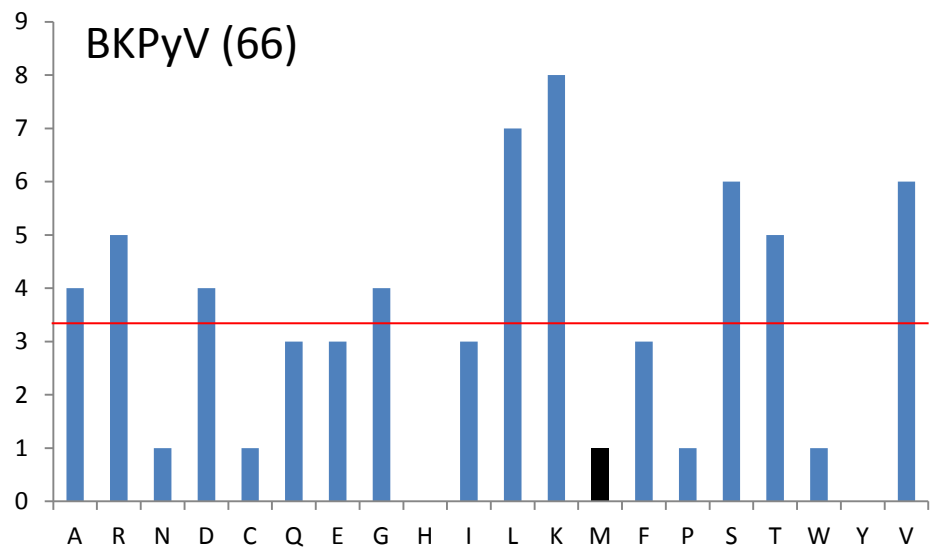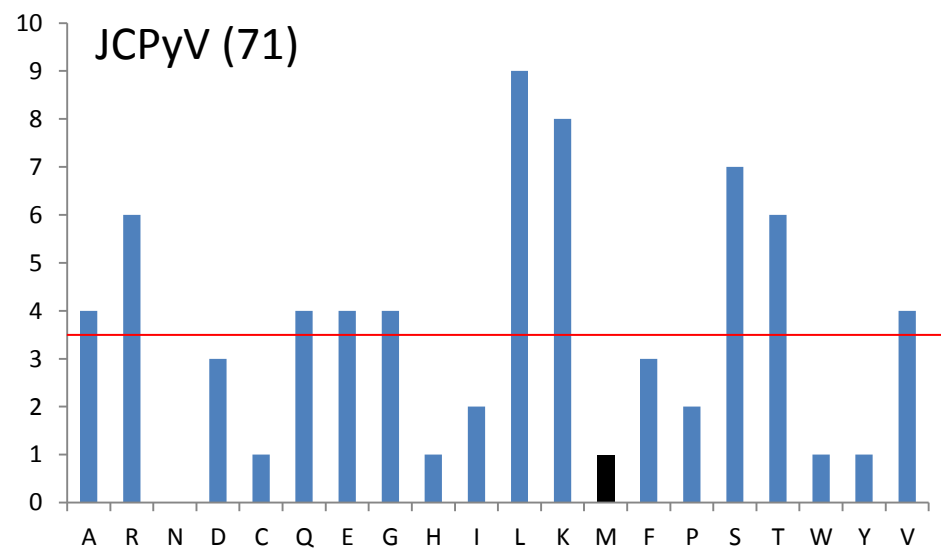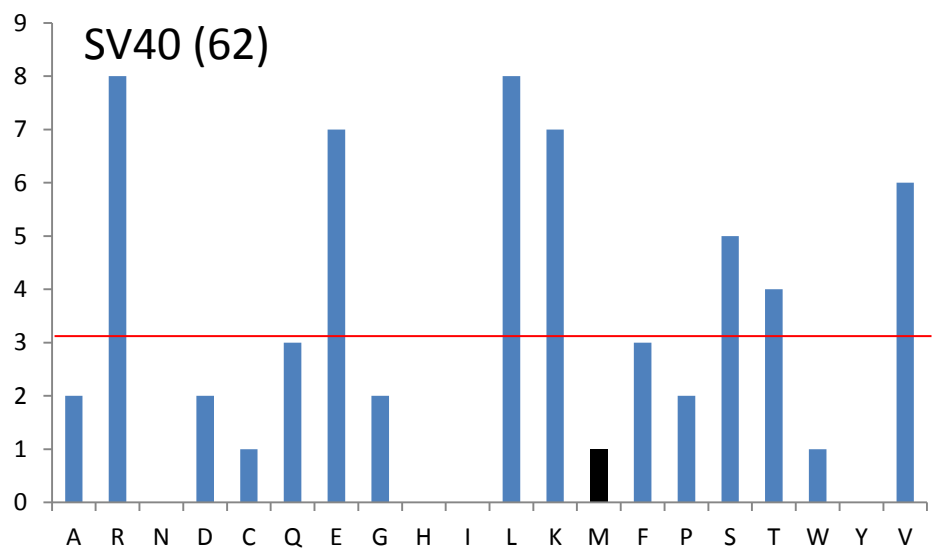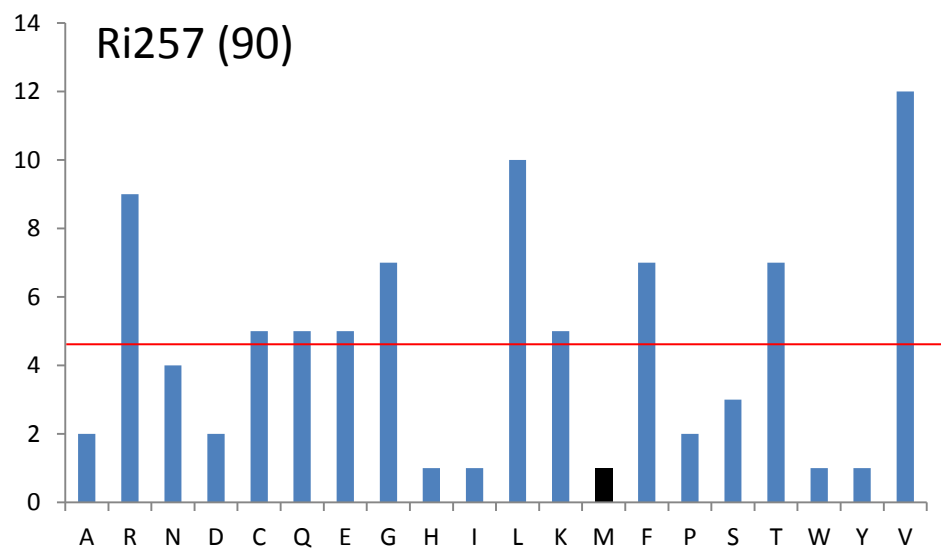

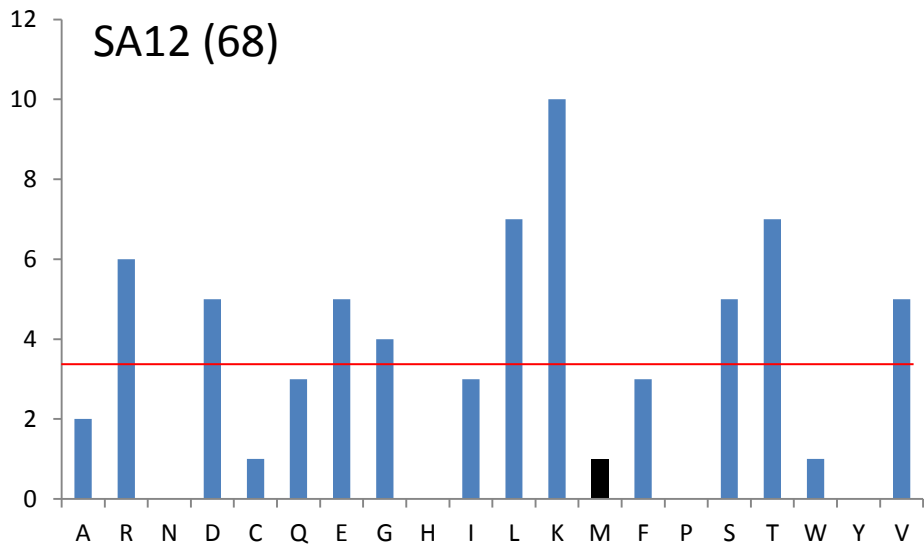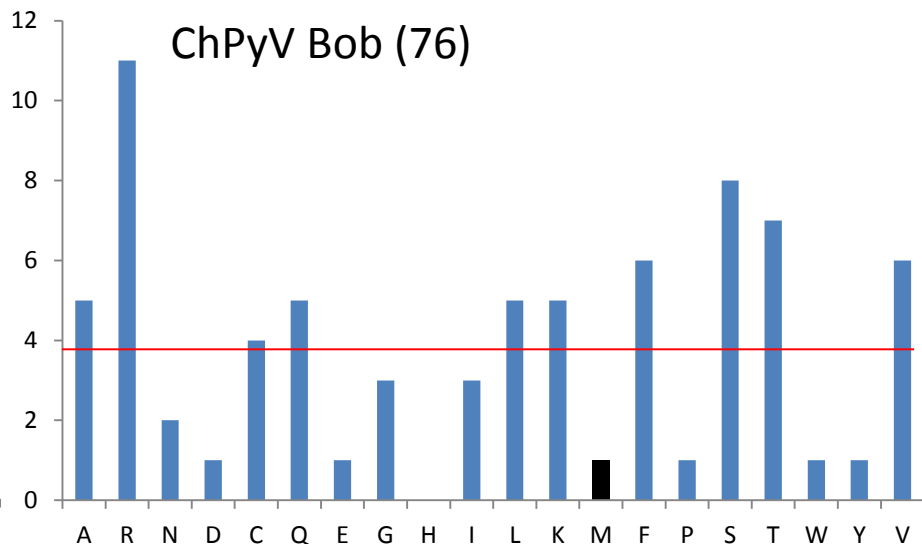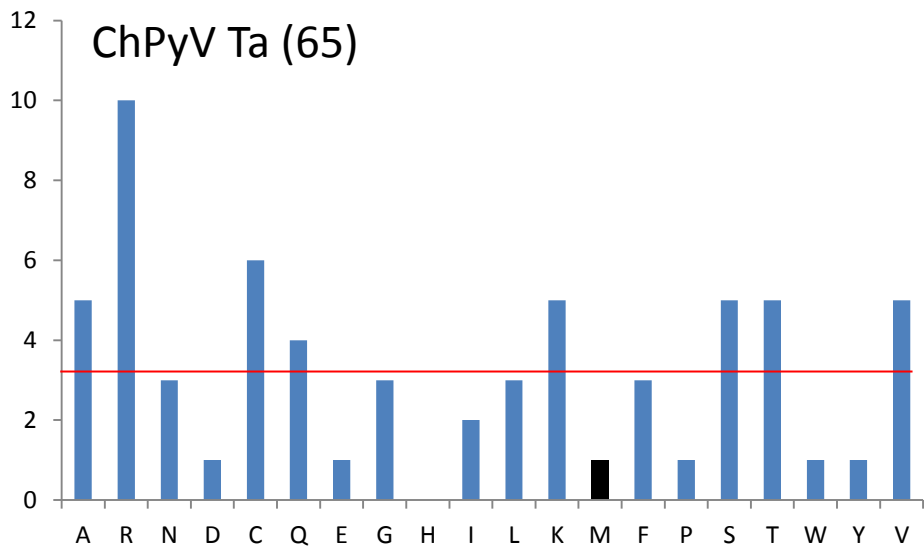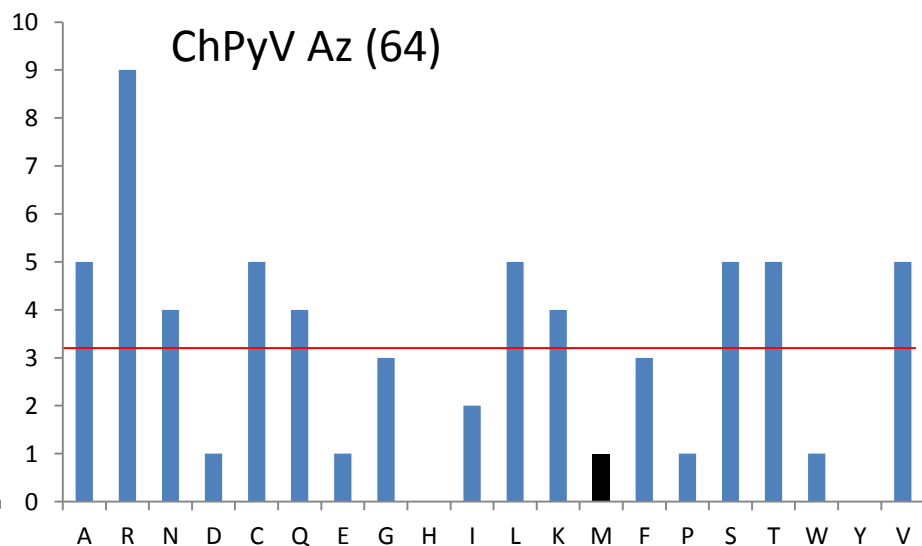

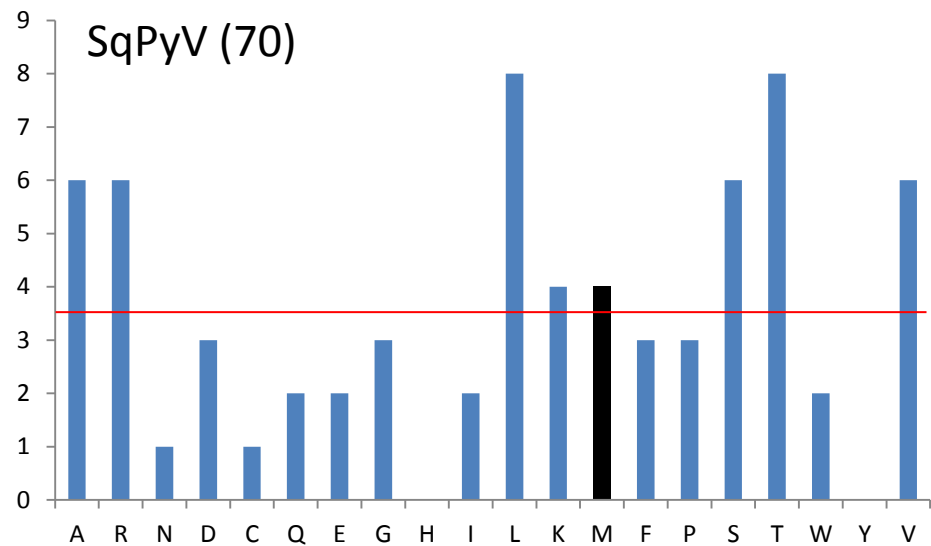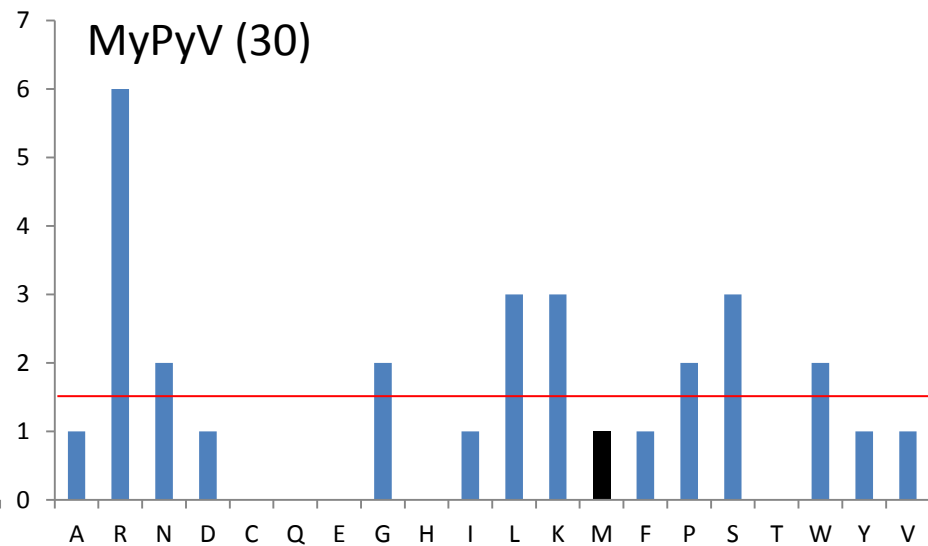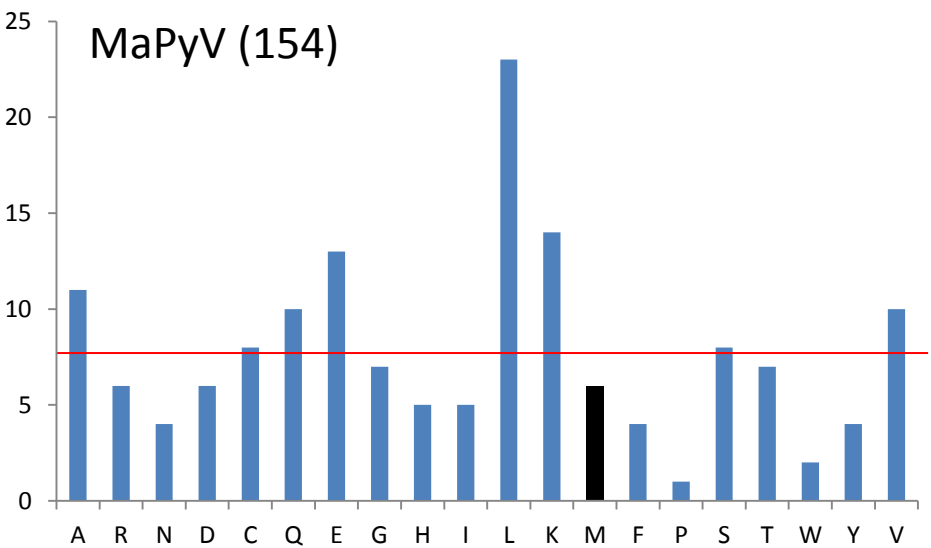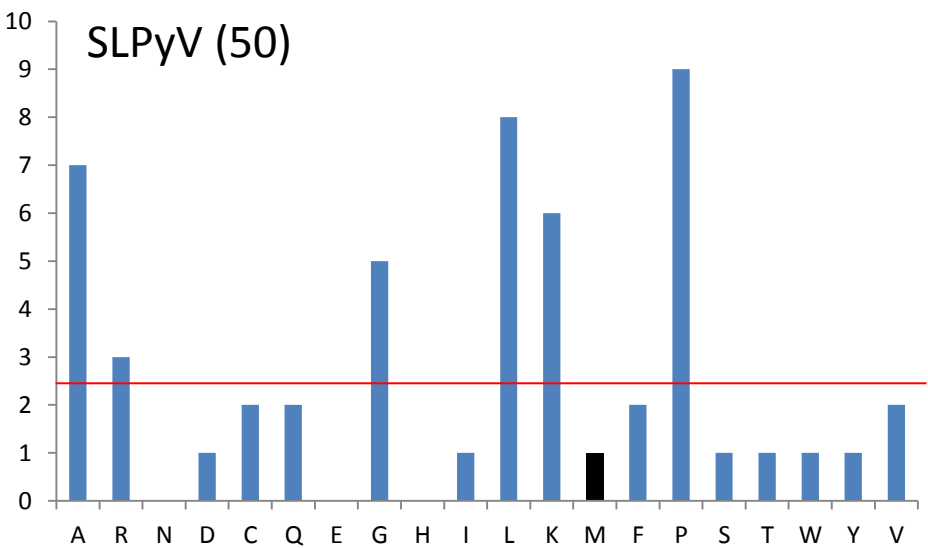

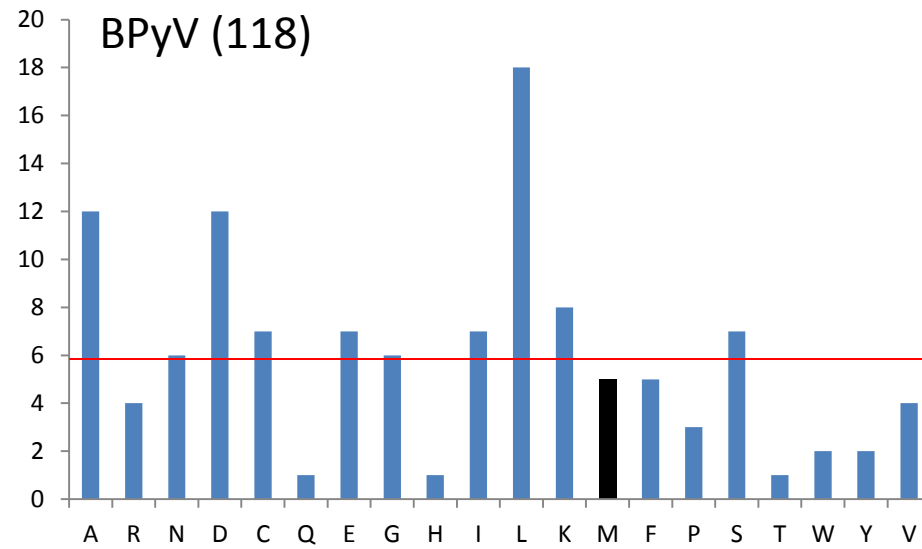

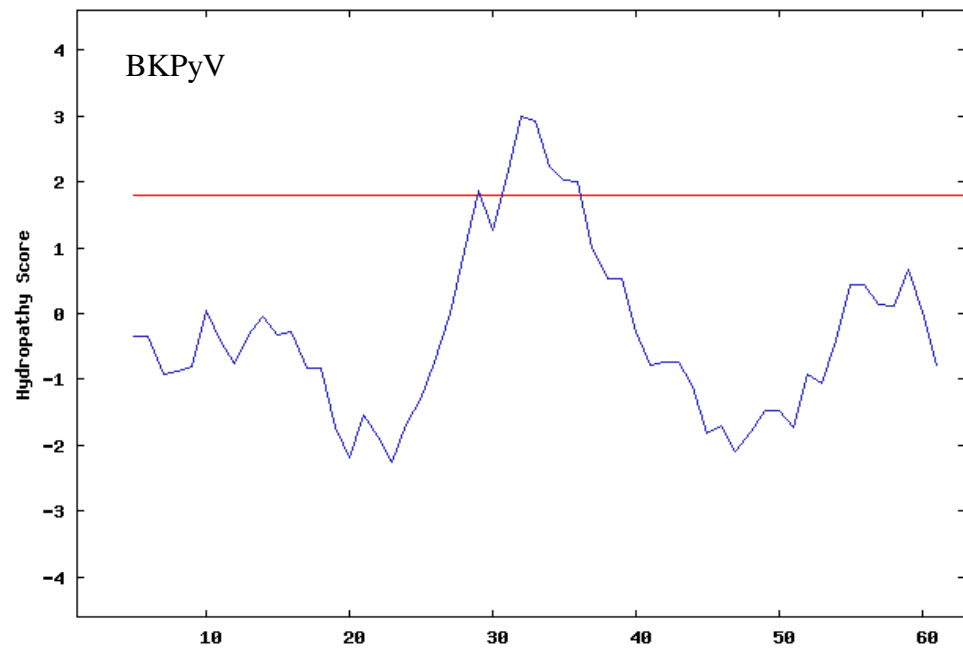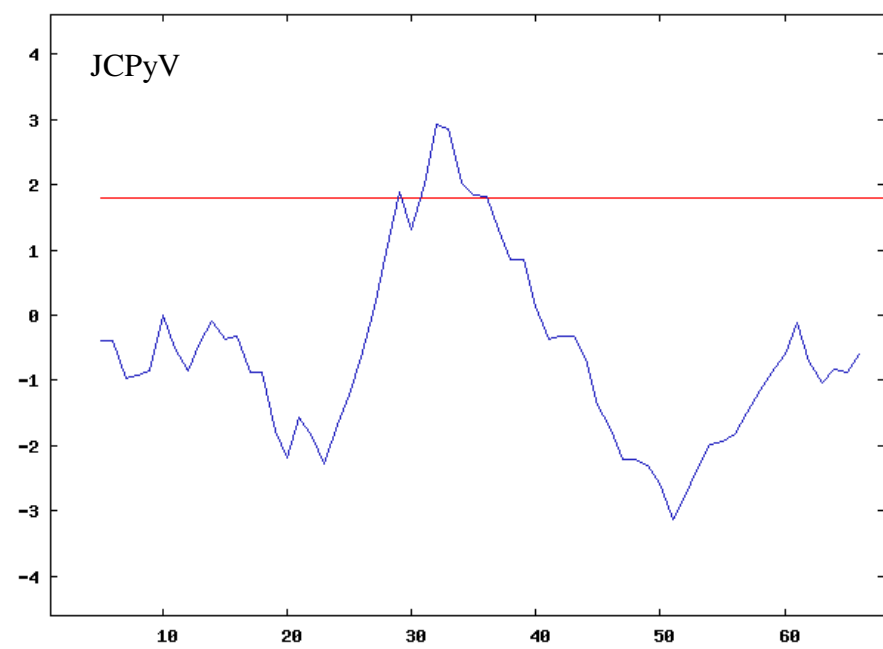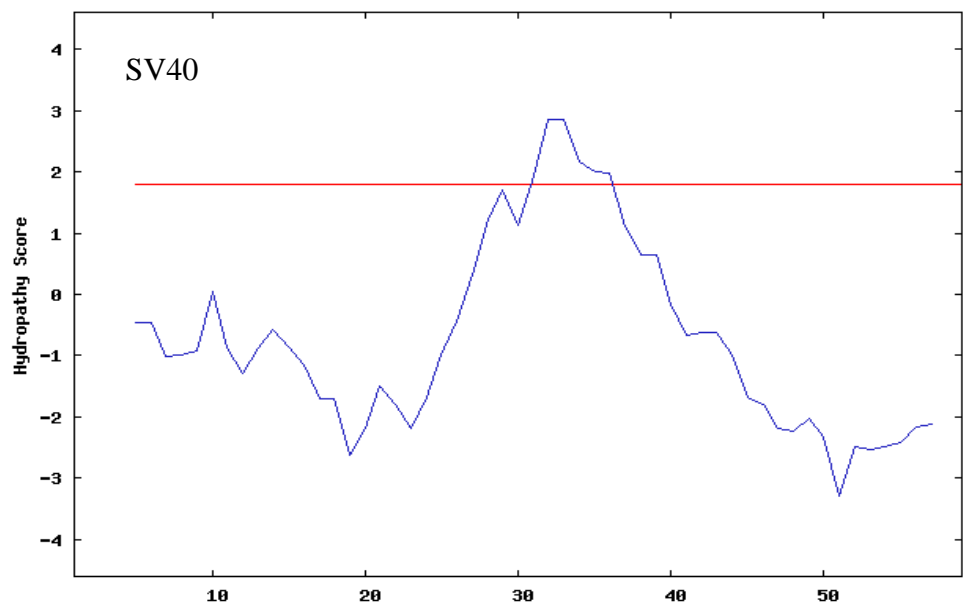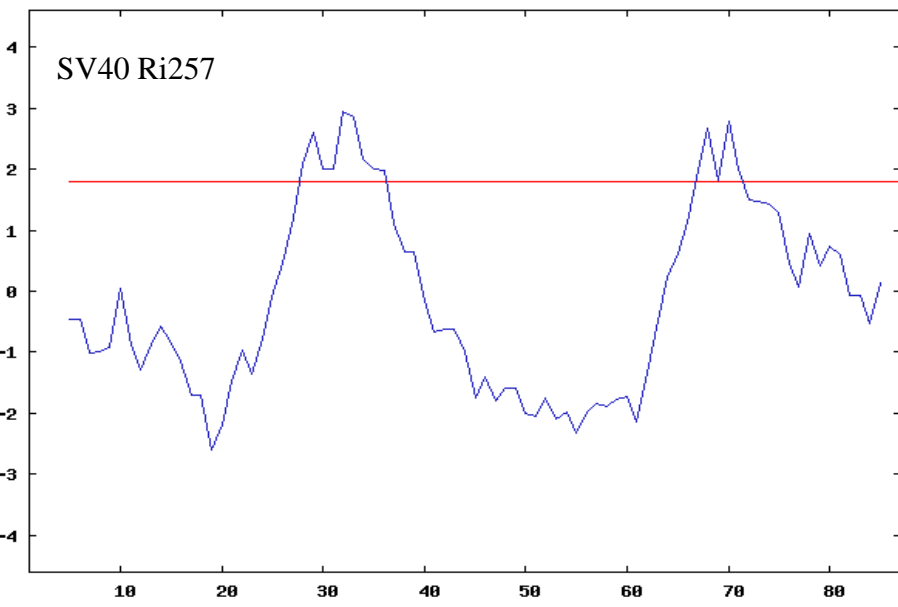

Figure S1

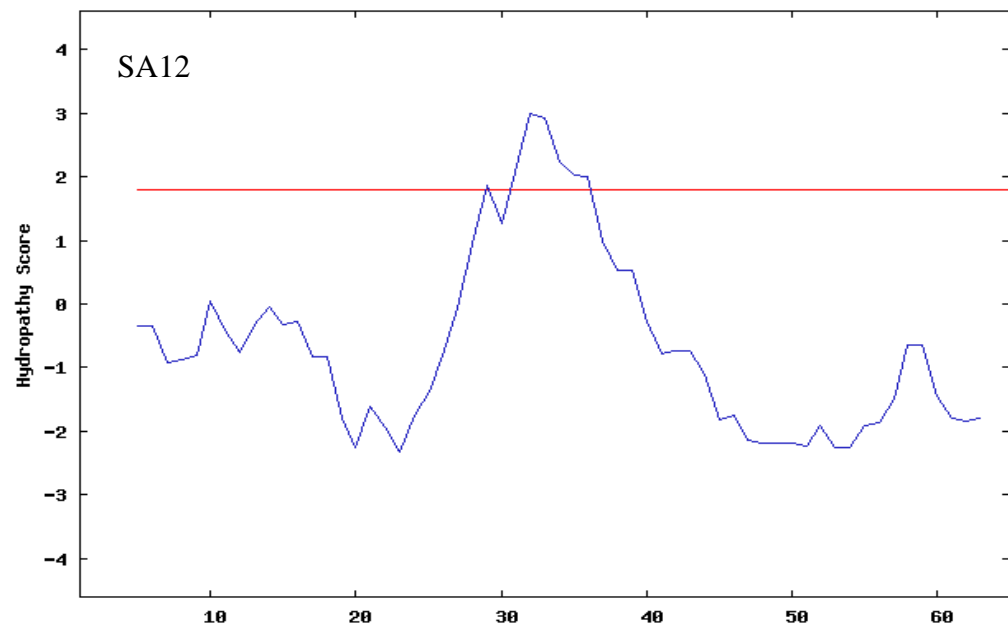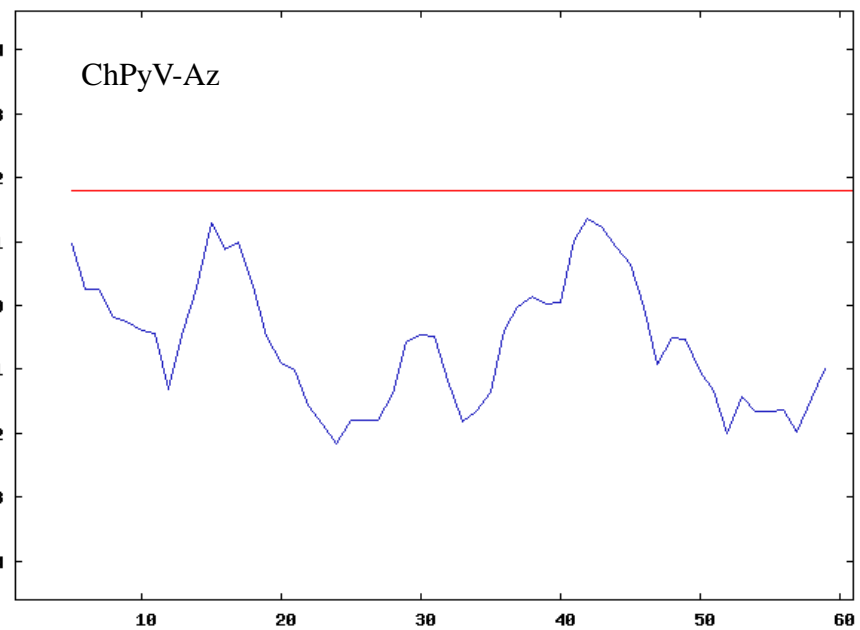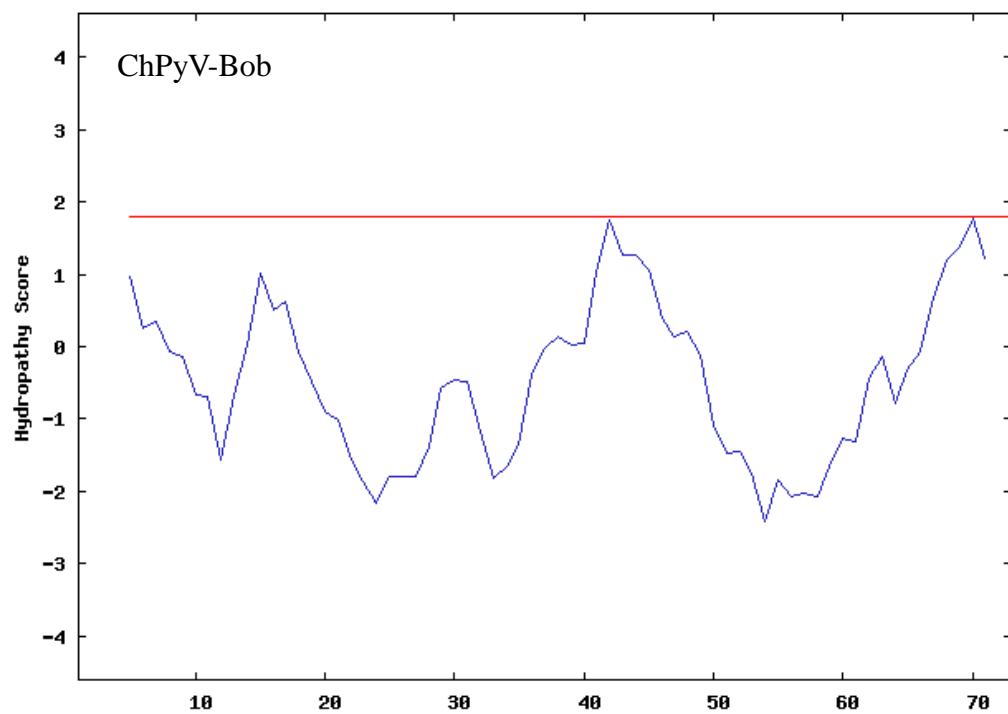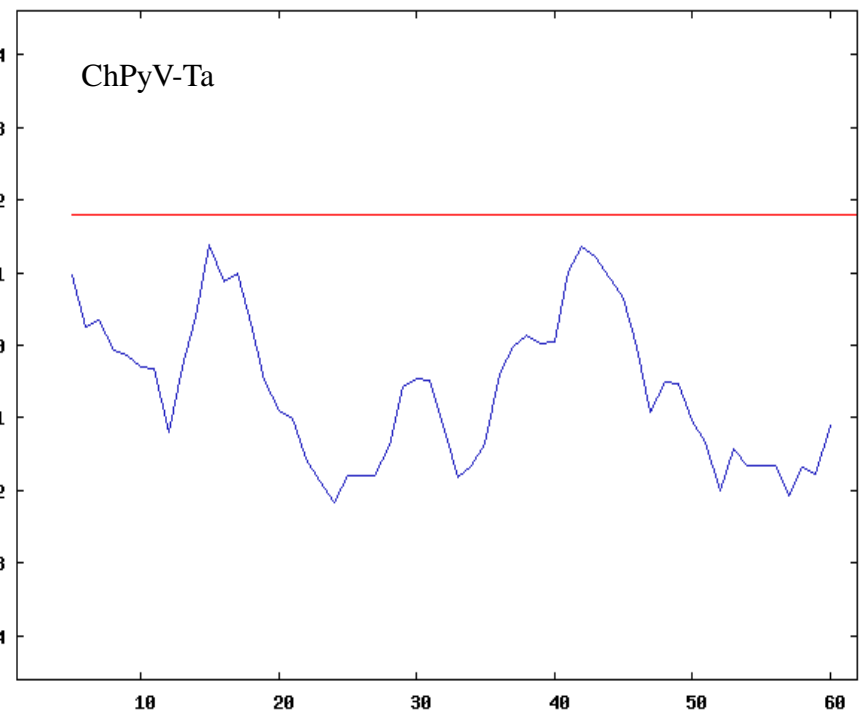



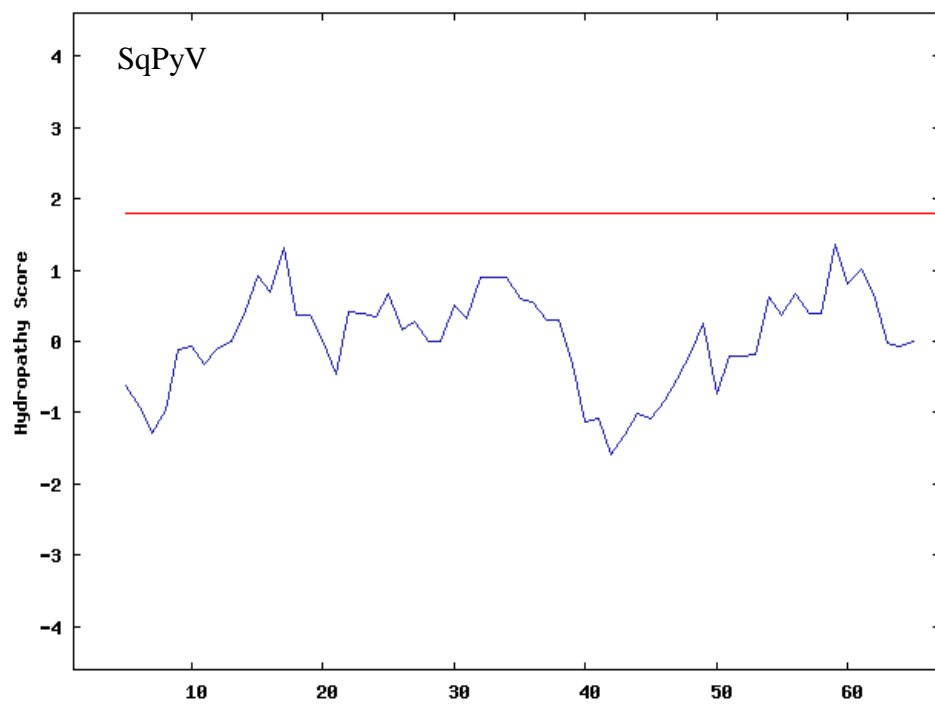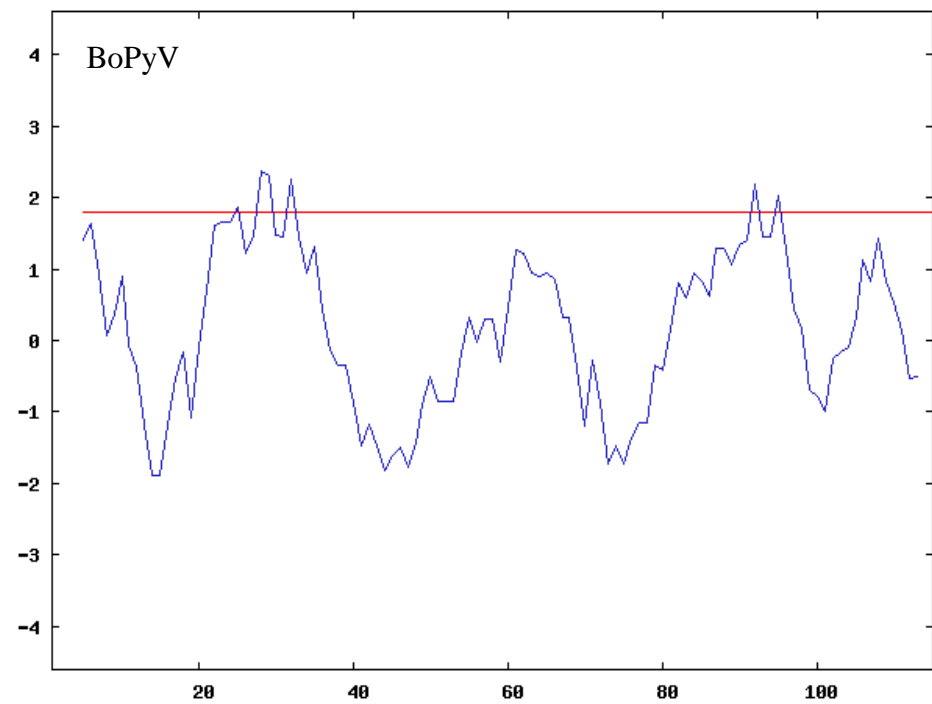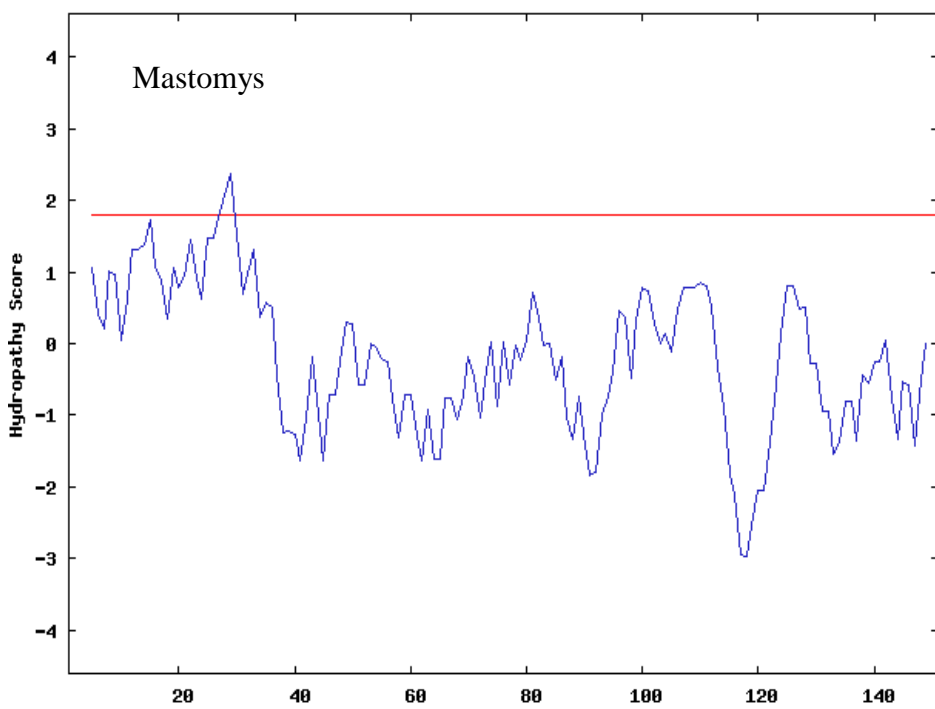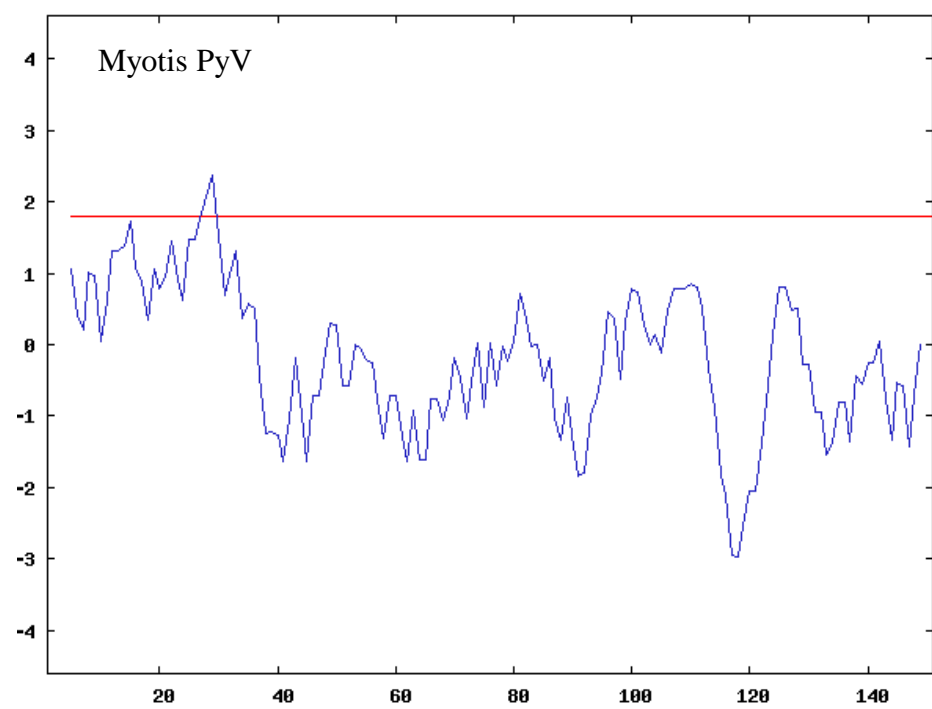

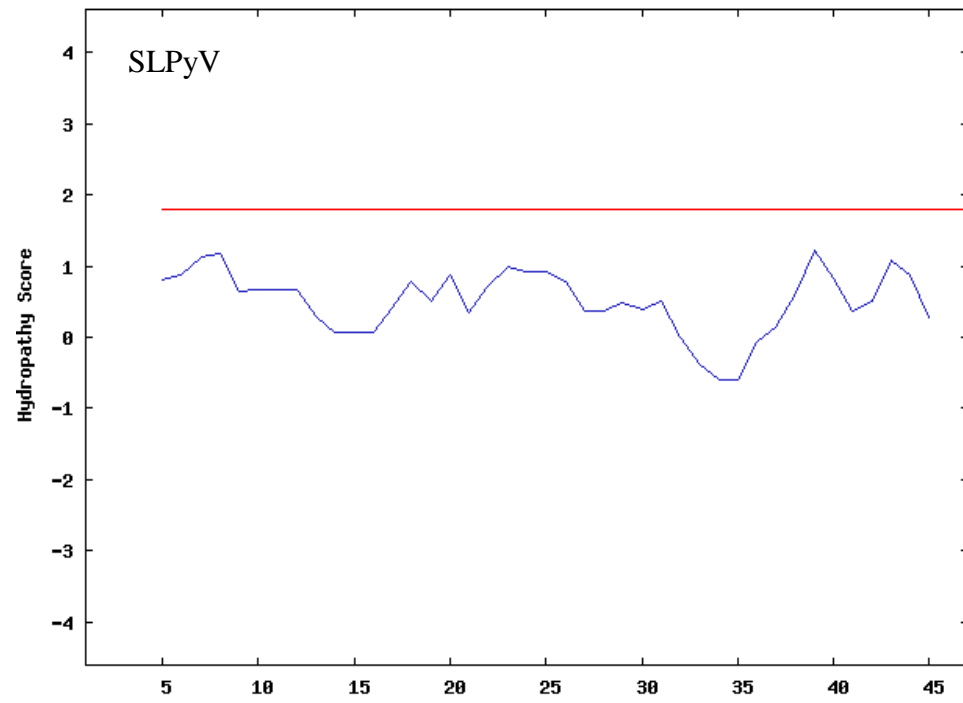

Supplement: mmc1.pdf [file mmc1.pdf]
